# Supplementary material for: Atropisomers and a copper(ii) complex derived from 1,3-dimethyl-5-(8′-quinolinylazo)-6-aminouracil: structures, magnetism and biological properties
Source: Royal Society of Chemistry journal article supplement (doi:10.1039/d3nj04598f), 2023-01-01
Supplement: d3nj04598f1.pdf [file d3nj04598f1.pdf]

## Electronic Supplementary Information (ESI)

### Atropisomers and a copper(II) complex derived from 1,3-dimethyl-5-(8'-quinolinylo)-6-aminouracil: structures, magnetism and biological properties

Nishithendu Bikash Nandi<sup>a</sup>, Nisan Das<sup>a</sup>, Susanta Ghanta<sup>a</sup>, Krishti Rekha Puzari<sup>b</sup>, Pranab Dutta<sup>b</sup>, Julia Kłak<sup>\*c</sup>, Lesław Sieroń<sup>d</sup>, Waldemar Maniukiewicz<sup>\*d</sup>, Tarun Kumar Misra<sup>\*a</sup>

<sup>a</sup>Department of Chemistry, National Institute of Technology Agartala, Tripura799046, India

<sup>b</sup>School of Crop Protection, College of Post Graduate Studies in Agricultural Sciences, Central Agricultural University, Meghalaya, India

<sup>c</sup>Faculty of Chemistry, University of Wrocław, Wrocław 50383, Poland

<sup>d</sup>Institute of General and Ecological Chemistry, Lodz University of Technology, Lodz 90924, Poland

#### Contents

| Figures/Tables                                                                                                                                                                                                         | Pages        |
|------------------------------------------------------------------------------------------------------------------------------------------------------------------------------------------------------------------------|--------------|
| <b>Figure S1.</b> UV-Vis spectra for monitoring conversion of H <sub>2</sub> L to $\beta$ -isomer in presence of Cu <sup>2+</sup> .                                                                                    | <b>2</b>     |
| <b>Figure S2.</b> FT-IR spectrum of H <sub>2</sub> L (1).                                                                                                                                                              | <b>2</b>     |
| <b>Figure S3.</b> FT-IR spectrum of $\alpha$ -atropisomer(2) of 8-azaxanthine.                                                                                                                                         | <b>3</b>     |
| <b>Figure S4.</b> FT-IR spectrum of Cu(II)-complex (4).                                                                                                                                                                | <b>3</b>     |
| <b>Figure S5.</b> Hydrogen bond interactions existed in (a) $\alpha$ -atropisomer, (b) $\beta$ -atropisomer.                                                                                                           | <b>4</b>     |
| <b>Figure S6.</b> Molecular packing of $\alpha$ -atropisomer (2) of 8-azaxanthine.                                                                                                                                     | <b>4</b>     |
| <b>Figure S7.</b> Molecular packing of $\beta$ -atropisomer (3) of azaxanthine.                                                                                                                                        | <b>5</b>     |
| <b>Figure S8.</b> H-bonding guided molecular assemble of Cu(II)-complex.                                                                                                                                               | <b>5</b>     |
| <b>Figure S9.</b> Molecular packing of Cu(II)-Complex, 4.                                                                                                                                                              | <b>6</b>     |
| <b>Figure S10.</b> <sup>1</sup> H NMR spectrum of H <sub>2</sub> L.                                                                                                                                                    | <b>6</b>     |
| <b>Figure S11.</b> <sup>1</sup> H NMR spectrum of $\alpha$ -atropisomer (2) of 8-azaxanthine.                                                                                                                          | <b>7</b>     |
| <b>Figure S12.</b> <sup>13</sup> C NMR spectrum of H <sub>2</sub> L.                                                                                                                                                   | <b>7</b>     |
| <b>Figure S13.</b> <sup>13</sup> C NMR spectrum of $\alpha$ -atropisomer (2) of 8-azaxanthine.                                                                                                                         | <b>8</b>     |
| <b>Figure S14.</b> The field dependence of the magnetization ( $M$ per one Cu <sup>II</sup> cation) at 2 K for 4. The solid line is the Brillouin function curve for one uncoupled spin with $S = 1/2$ and $g = 2.0$ . | <b>8</b>     |
| <b>Figure S15.</b> The powder EPR (X-band) spectrum of 4 at 77 K.                                                                                                                                                      | <b>9</b>     |
| <b>Table S1.</b> Assigned stretching frequencies of all the synthesized compounds.                                                                                                                                     | <b>9</b>     |
| <b>Table S2.</b> Bond length of atropisomers of 8-azaxanthine and Cu(II)-complex of H <sub>2</sub> L.                                                                                                                  | <b>10</b>    |
| <b>Table S3.</b> Bond angles of atropisomers of 8-azaxanthine and Cu(II)-complex of H <sub>2</sub> L.                                                                                                                  | <b>11-12</b> |



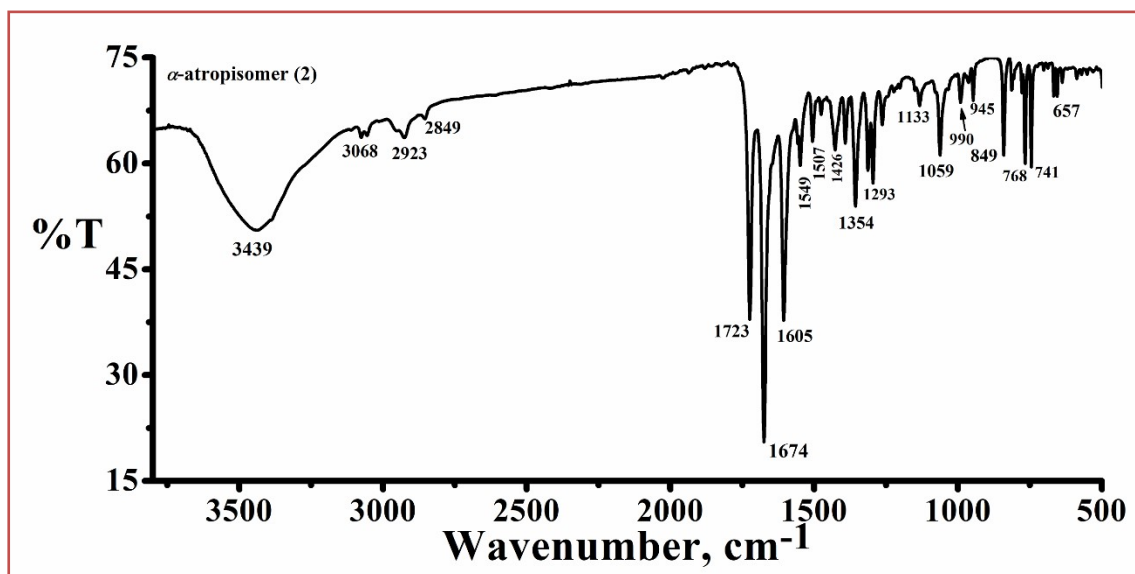

Figure S3. FT-IR spectrum of  $\alpha$ -atropisomer(2) of 8-azaxanthine.

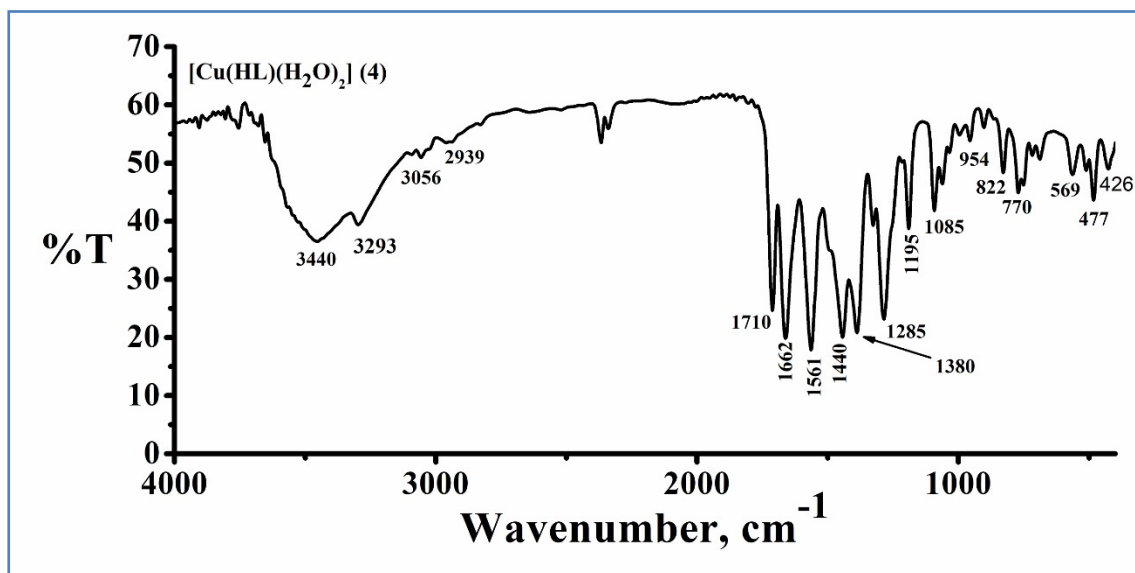

Figure S4. FT-IR spectrum of Cu(II)-complex (4).

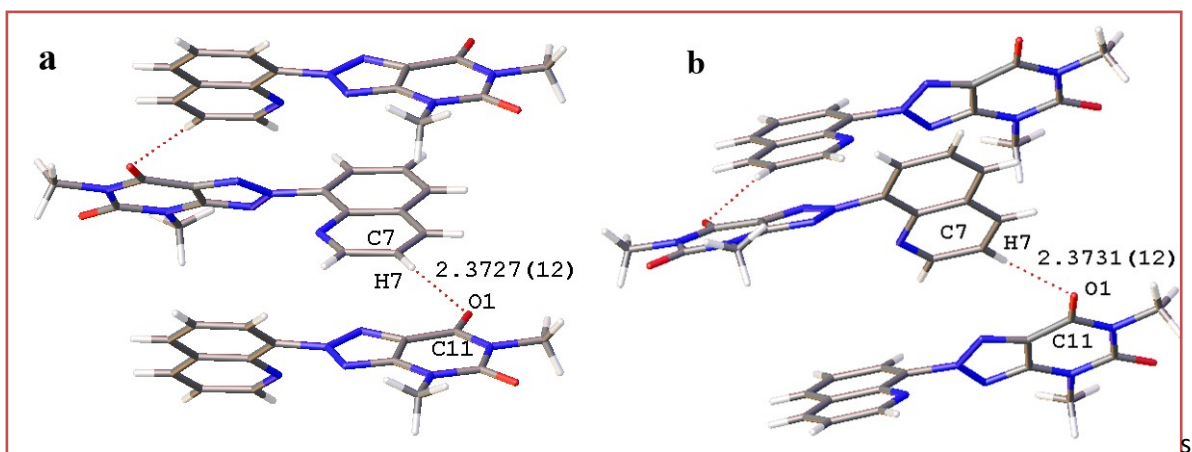

**Figure S5.** Hydrogen bond interactions existed in (a)  $\alpha$ -atropisomer, (b)  $\beta$ -atropisomer.

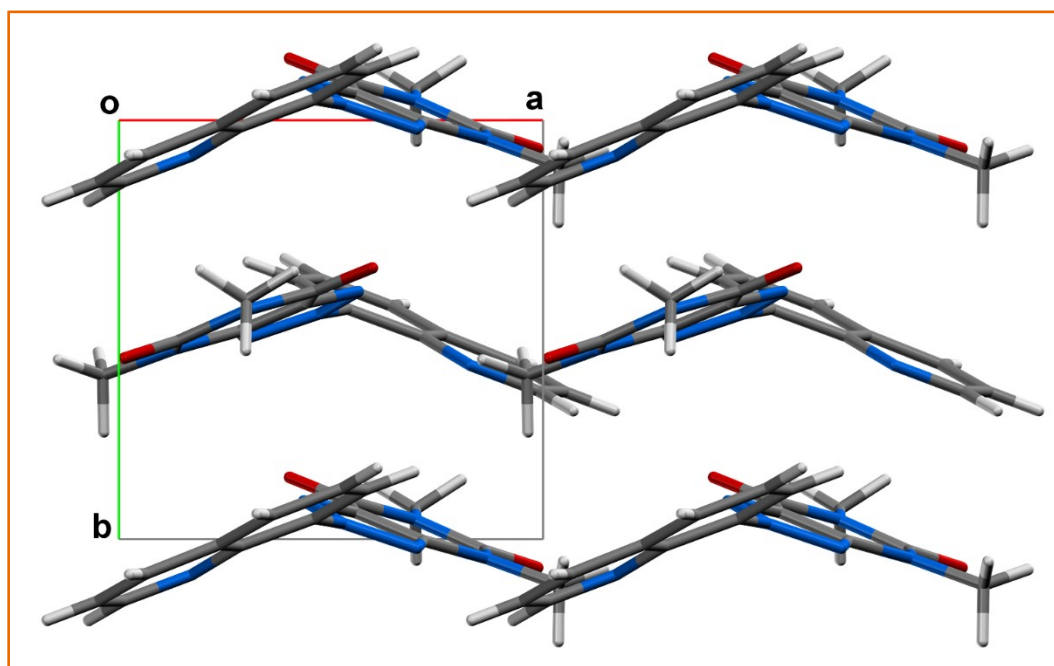

**Figure S6.** Molecular packing of of  $\alpha$ -atropisomer (2) of 8-azaxanthine

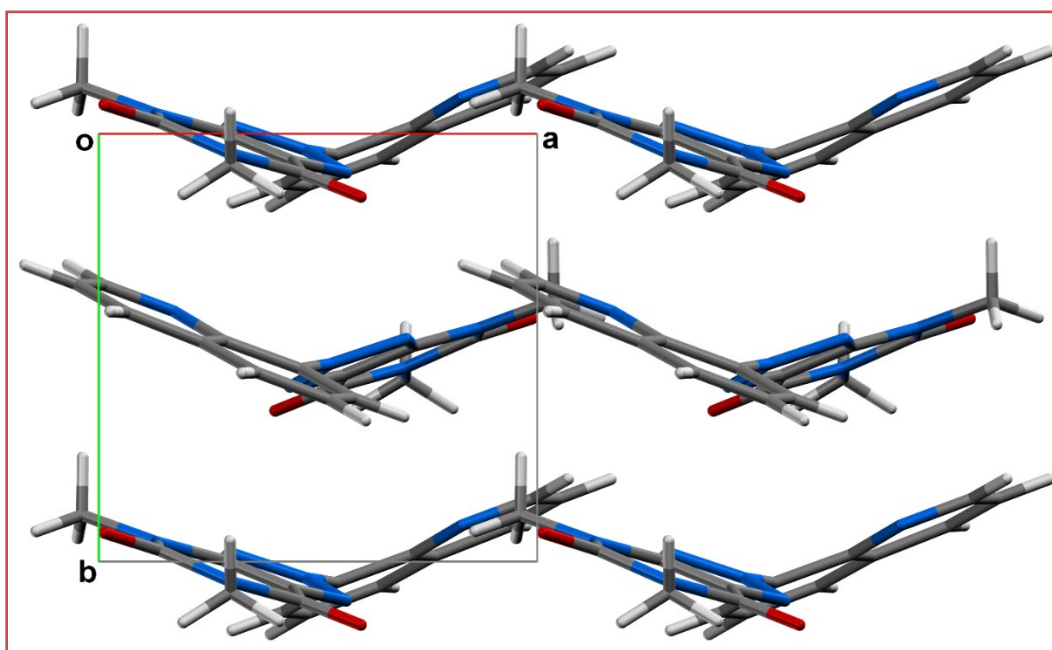

**Figure S7.** Molecular packing of  $\beta$ -atropisomer (**3**) of azaxanthine.

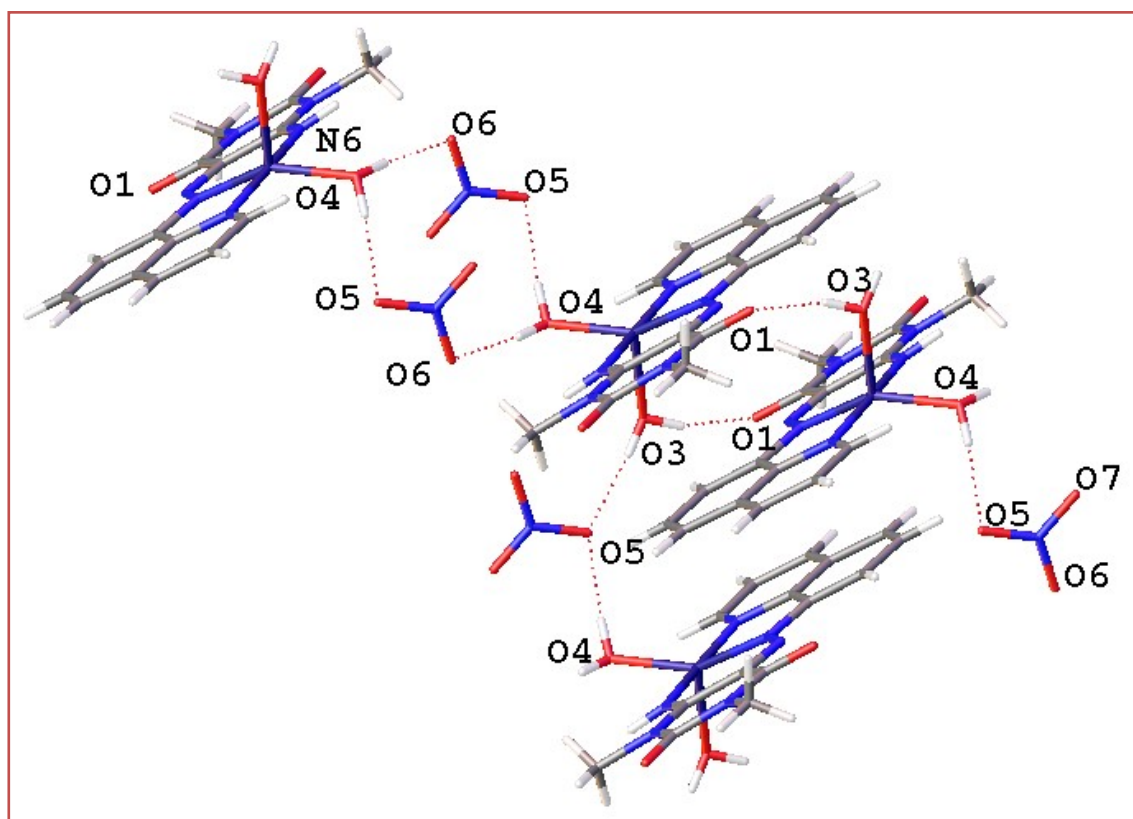

**Figure S8.** H-bonding guided molecular assembly of Cu(II)-complex.

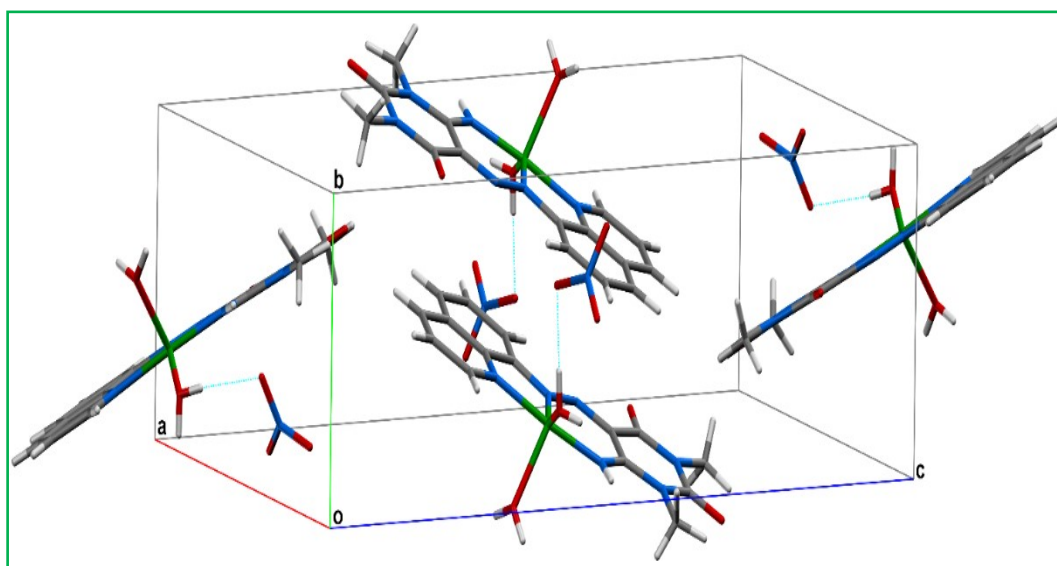

**Figure S9.** Molecular packing of of Cu(II)-Complex, 4.

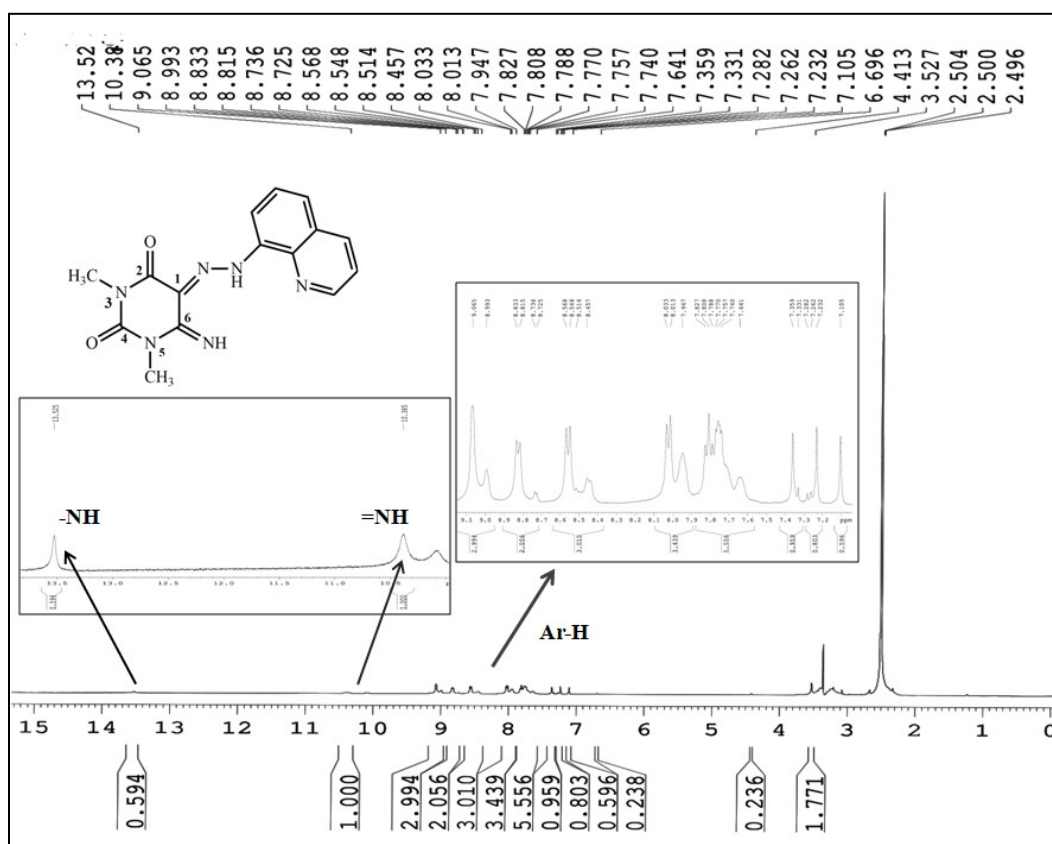

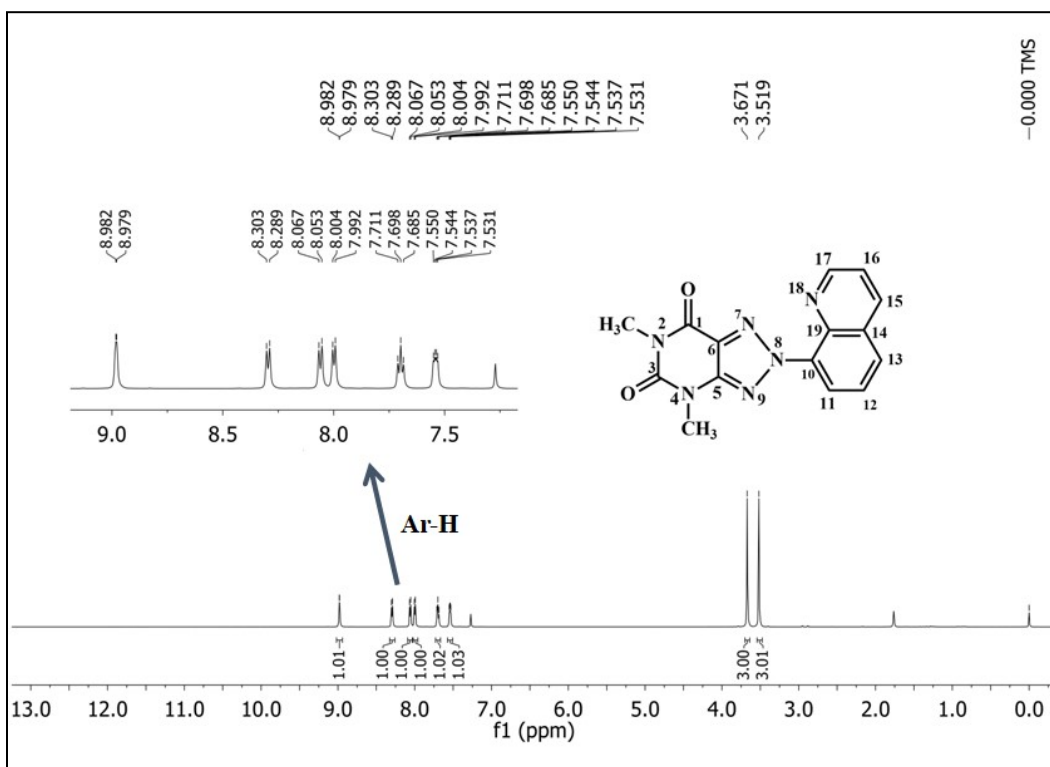

Figure S11.  $^1\text{H}$  NMR spectrum of  $\alpha$ -atropisomer (2) of 8-azaxanthine.

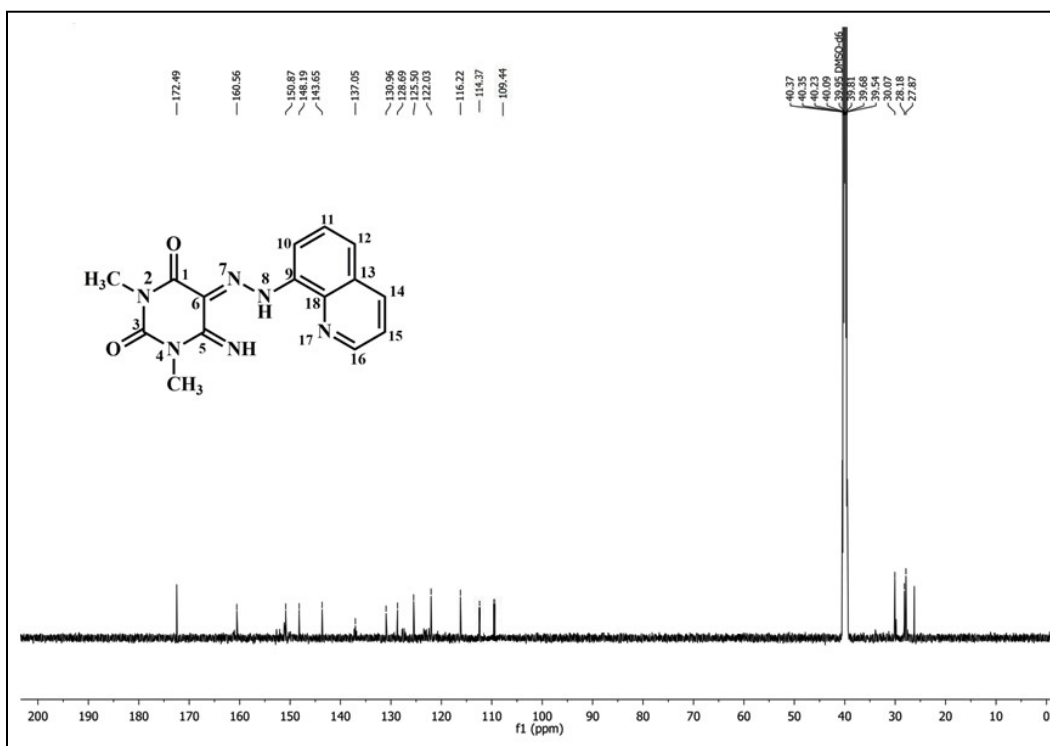

Figure S12.  $^{13}\text{C}$  NMR spectrum of  $\text{H}_2\text{L}$ .

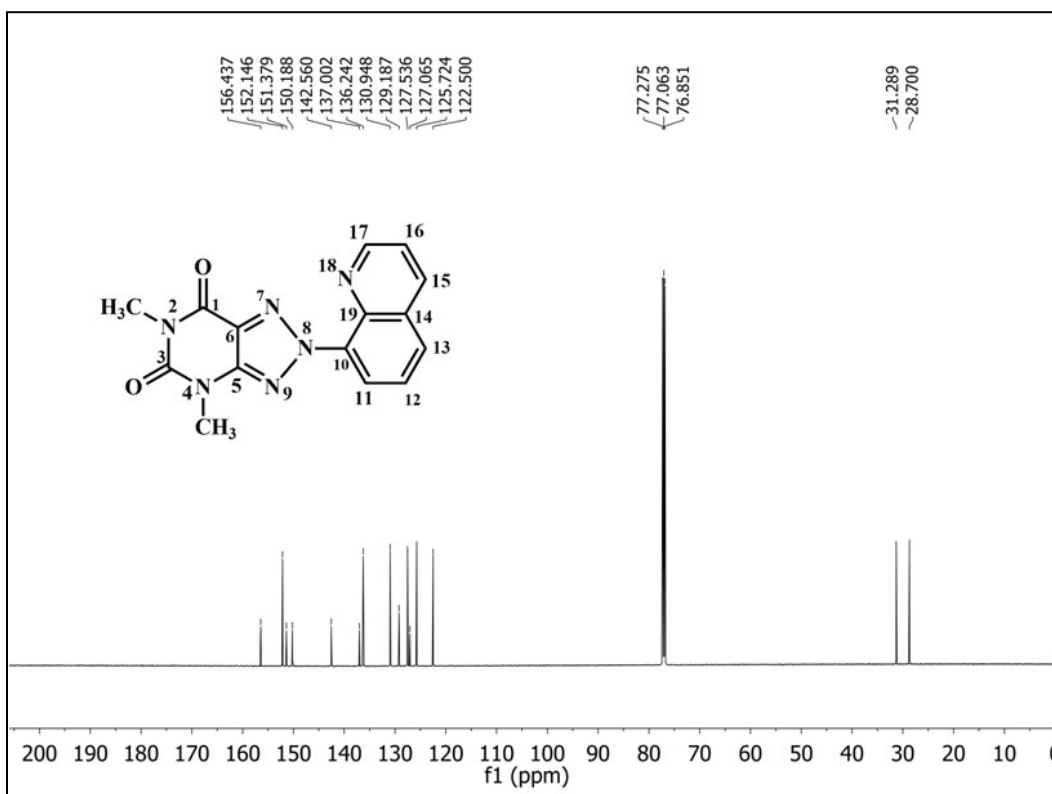

**Figure S13.**  $^{13}\text{C}$  NMR spectrum of  $\alpha$ -atropisomer (2) of 8-azaxanthine.

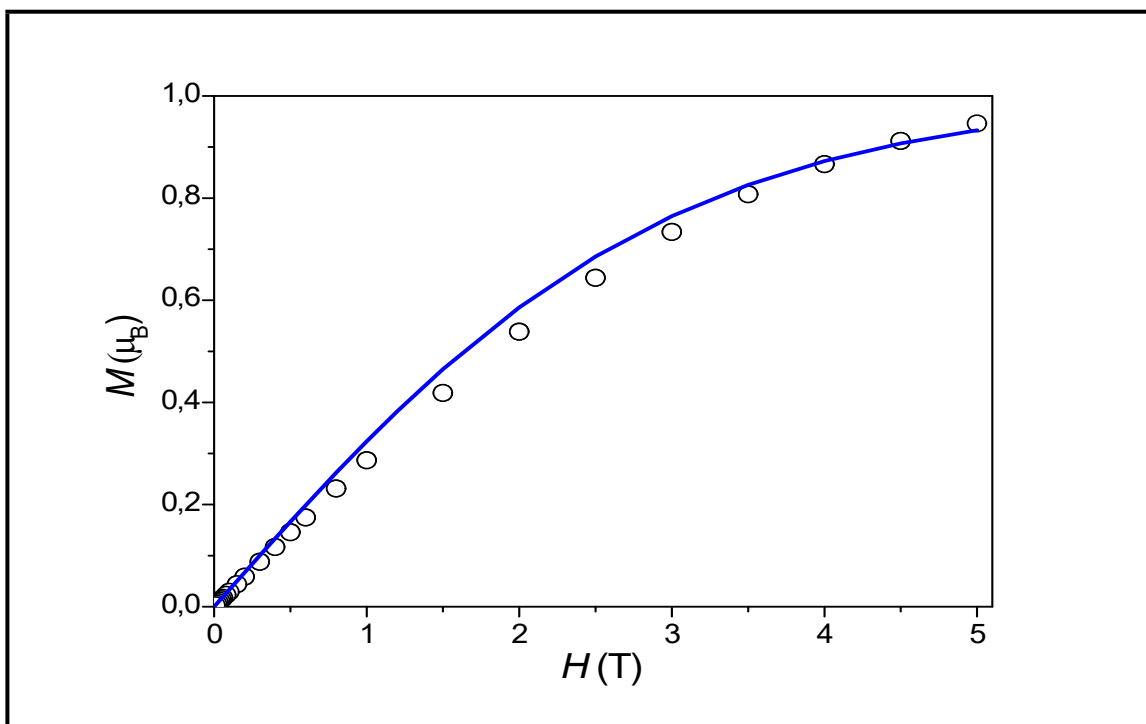

**Figure S14.** The field dependence of the magnetization ( $M$  per one  $\text{Cu}^{\text{II}}$  cation) at 2 K for 4. The solid line is the Brillouin function curve for one uncoupled spin with  $S = 1/2$  and  $g = 2.0$ .



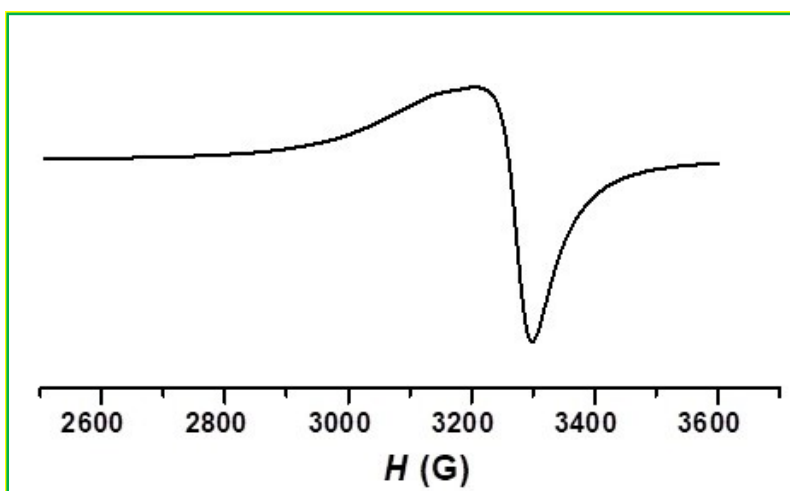

**Figure S15.** The powder EPR (X-band) spectrum of **4** at 77 K.

**Table S1.** Assigned stretching frequencies of all the synthesised compounds.

| Functional groups    | Ligand, H <sub>2</sub> L | 8-Azaxanthine<br>( $\alpha$ -atropisomer) | Cu(II)-Complex              |
|----------------------|--------------------------|-------------------------------------------|-----------------------------|
| -NH and Ar-H         | 3438, 2925, 2847         | 3439, 3068,<br>2923, 2849                 | 3440, 3293,<br>, 3056, 2939 |
| > <sup>2</sup> C=O   | 1700                     | 1723                                      | 1710                        |
| > <sup>4</sup> C=O   | 1644                     | 1674                                      | 1662                        |
| -C=N/-C=C-           | 1617                     | 1605                                      | 1561                        |
| -N=N-                | 1452                     | -                                         | 1462                        |
| -C-O                 | 1281                     | 1293                                      | 1285                        |
| -C-C-                | 1246                     |                                           | 1195                        |
| -C-N-                | 1087                     |                                           | 1085                        |
| -N-C <sub>bend</sub> | -                        | 1354                                      | -                           |
| N-C <sub>stret</sub> | -                        | 1059                                      | -                           |
| Other bands          | 935, 800, 741, 471       | 990, 849, 768, 741,<br>657                | 954, 822, 770, 569,<br>477  |

**Table S2.** Bond length of atropisomers of 8-azaxanthine and Cu(II)-complex of H<sub>2</sub>L.

| <b>1,3-dimethyl-8-(8'-quinolinyl)azaxanthine</b> |                 |                                 |                 | <b>Cu(II)-Complex (4)</b> |                 |
|--------------------------------------------------|-----------------|---------------------------------|-----------------|---------------------------|-----------------|
| <b><i>α</i>-atropisomer (2)</b>                  |                 | <b><i>β</i>-atropisomer (3)</b> |                 |                           |                 |
| <b>Bond</b>                                      | <b>Length/Å</b> | <b>Bond</b>                     | <b>Length/Å</b> | <b>Bond</b>               | <b>Length/Å</b> |
| O1-C11                                           | 1.217(2)        | O1-C11                          | 1.2180(19)      | Cu1-O3                    | 2.2207(13)      |
| O2-C12                                           | 1.214(2)        | O2-C12                          | 1.215(2)        | Cu1-O4                    | 2.0570(12)      |
| N1-C8                                            | 1.330(2)        | N1-C8                           | 1.328(2)        | Cu1-N1                    | 1.9837(15)      |
| N1-C9                                            | 1.366(2)        | N1-C9                           | 1.366(2)        | Cu1-N2                    | 1.9557(15)      |
| N2-N3                                            | 1.327(2)        | N2-N3                           | 1.3277(19)      | Cu1-N6                    | 1.9211(15)      |
| N2-N4                                            | 1.362(2)        | N2-N4                           | 1.3616(19)      | O1-C11                    | 1.225(2)        |
| N2-C1                                            | 1.432(2)        | N2-C1                           | 1.432(2)        | O2-C12                    | 1.220(2)        |
| N3-C10                                           | 1.343(2)        | N3-C10                          | 1.343(2)        | N1-C8                     | 1.331(2)        |
| N4-C13                                           | 1.325(2)        | N4-C13                          | 1.325(2)        | N1-C9                     | 1.365(2)        |
| N5-C11                                           | 1.403(2)        | N5-C11                          | 1.403(2)        | N2-N3                     | 1.297(2)        |
| N5-C12                                           | 1.409(2)        | N5-C12                          | 1.409(2)        | N2-C1                     | 1.413(2)        |
| N5-C14                                           | 1.471(2)        | N5-C14                          | 1.472(2)        | N3-C10                    | 1.340(2)        |
| N6-C12                                           | 1.380(2)        | N6-C12                          | 1.380(2)        | N4-C11                    | 1.391(2)        |
| N6-C13                                           | 1.374(2)        | N6-C13                          | 1.372(2)        | N4-C12                    | 1.380(2)        |
| N6-C15                                           | 1.467(2)        | N6-C15                          | 1.466(2)        | N4-C14                    | 1.469(2)        |
| C1-C2                                            | 1.371(2)        | C1-C2                           | 1.372(2)        | N5-C12                    | 1.389(2)        |
| C1-C9                                            | 1.424(2)        | C1-C9                           | 1.424(2)        | N5-C13                    | 1.392(2)        |
| C2-C3                                            | 1.411(3)        | C2-C3                           | 1.410(2)        | N5-C15                    | 1.468(2)        |
| C3-C4                                            | 1.366(3)        | C3-C4                           | 1.365(2)        | N6-C13                    | 1.296(2)        |
| C4-C5                                            | 1.419(3)        | C4-C5                           | 1.418(2)        | C1-C2                     | 1.369(2)        |
| C5-C6                                            | 1.414(2)        | C5-C6                           | 1.415(2)        | C1-C9                     | 1.425(2)        |
| C5-C9                                            | 1.427(2)        | C5-C9                           | 1.428(2)        | C2-C3                     | 1.412(2)        |
| C6-C7                                            | 1.364(2)        | C6-C7                           | 1.364(2)        | C3-C4                     | 1.377(3)        |
| C7-C8                                            | 1.410(3)        | C7-C8                           | 1.411(3)        | C4-C5                     | 1.419(3)        |
| C10-C11                                          | 1.452(2)        | C10-C11                         | 1.450(2)        | C5-C6                     | 1.415(2)        |
| C10-C13                                          | 1.389(2)        | C10-C13                         | 1.390(2)        | C5-C9                     | 1.413(2)        |
|                                                  |                 |                                 |                 | O5-N7                     | 1.2742(19)      |
|                                                  |                 |                                 |                 | C6-C7                     | 1.370(3)        |
|                                                  |                 |                                 |                 | O6-N7                     | 1.2570(19)      |
|                                                  |                 |                                 |                 | C7-C8                     | 1.402(3)        |
|                                                  |                 |                                 |                 | O7-N7                     | 1.2336(19)      |
|                                                  |                 |                                 |                 | C10-C11                   | 1.462(2)        |
|                                                  |                 |                                 |                 | C10-C13                   | 1.442(2)        |

**Table S3.** Bond angles of atropisomers of 8-azaxanthine and Cu(II)-complex of H<sub>2</sub>L.

| <b>1,3-dimethyl-8-(8'-quinolinyl)azaxanthine</b> |                                     |                                           |                                     | <b>Cu(II)-Complex (4)</b> |                                     |
|--------------------------------------------------|-------------------------------------|-------------------------------------------|-------------------------------------|---------------------------|-------------------------------------|
| <b><math>\alpha</math>-atropisomer (2)</b>       |                                     | <b><math>\beta</math>-atropisomer (3)</b> |                                     |                           |                                     |
| <b>Bond</b>                                      | <b>Angle /<math>^{\circ}</math></b> | <b>Bond</b>                               | <b>Angle /<math>^{\circ}</math></b> | <b>Bond</b>               | <b>Angle /<math>^{\circ}</math></b> |
| C8-N1-C9                                         | 116.83(15)                          | C8-N1-C9                                  | 116.86(14)                          | O3-Cu1-O4                 | 86.46(5)                            |
| N3-N2-N4                                         | 116.69(13)                          | N3-N2-N4                                  | 116.64(13)                          | O3-Cu1-N1                 | 87.68(5)                            |
| N3-N2-C1                                         | 124.85(14)                          | N3-N2-C1                                  | 124.83(13)                          | O3-Cu1-N2                 | 120.49(5)                           |
| N4-N2-C1                                         | 118.35(13)                          | N4-N2-C1                                  | 118.42(13)                          | O3-Cu1-N6                 | 98.12(5)                            |
| N2-N3-C10                                        | 102.39(13)                          | N2-N3-C10                                 | 102.38(13)                          | O4-Cu1-N1                 | 92.57(6)                            |
| N2-N4-C13                                        | 101.50(13)                          | N2-N4-C13                                 | 101.58(13)                          | O4-Cu1-N2                 | 152.31(6)                           |
| C11-N5-C12                                       | 127.98(15)                          | C11-N5-C12                                | 127.96(13)                          | O4-Cu1-N6                 | 92.95(6)                            |
| C11-N5-C14                                       | 116.93(15)                          | C11-N5-C14                                | 116.93(14)                          | N1-Cu1-N2                 | 83.08(6)                            |
| C12-N5-C14                                       | 115.06(15)                          | C12-N5-C14                                | 115.09(14)                          | N1-Cu1-N6                 | 172.23(6)                           |
| C12-N6-C13                                       | 118.92(14)                          | C12-N6-C13                                | 118.92(14)                          | N2-Cu1-N6                 | 89.50(6)                            |
| C12-N6-C15                                       | 120.02(14)                          | C12-N6-C15                                | 120.01(14)                          | Cu1-N1-C8                 | 128.49(13)                          |
| C13-N6-C15                                       | 121.05(14)                          | C13-N6-C15                                | 121.06(14)                          | Cu1-N1-C9                 | 112.60(11)                          |
| N2-C1-C2                                         | 116.80(14)                          | N2-C1-C2                                  | 116.76(14)                          | C8-N1-C9                  | 118.82(15)                          |
| N2-C1-C9                                         | 121.10(14)                          | N2-C1-C9                                  | 121.17(14)                          | Cu1-N2-N3                 | 131.21(12)                          |
| C2-C1-C9                                         | 122.01(15)                          | C2-C1-C9                                  | 121.96(15)                          | Cu1-N2-C1                 | 113.62(11)                          |
| C1-C2-C3                                         | 119.97(15)                          | C1-C2-C3                                  | 119.97(14)                          | N3-N2-C1                  | 115.13(14)                          |
| C2-C3-C4                                         | 120.40(16)                          | C2-C3-C4                                  | 120.46(15)                          | N2-N3-C10                 | 120.82(15)                          |
| C3-C4-C5                                         | 120.44(16)                          | C3-C4-C5                                  | 120.42(15)                          | C11-N4-C12                | 125.10(14)                          |
| C4-C5-C6                                         | 122.12(16)                          | C4-C5-C6                                  | 122.20(15)                          | C11-N4-C14                | 117.65(15)                          |
| C4-C5-C9                                         | 120.29(15)                          | C4-C5-C9                                  | 120.30(14)                          | C12-N4-C14                | 117.23(14)                          |
| C6-C5-C9                                         | 117.60(14)                          | C6-C5-C9                                  | 117.50(14)                          | C12-N5-C13                | 124.41(15)                          |
| C5-C6-C7                                         | 119.31(17)                          | C5-C6-C7                                  | 119.35(16)                          | C12-N5-C15                | 116.73(14)                          |
| C6-C7-C8                                         | 118.99(16)                          | C6-C7-C8                                  | 118.95(15)                          | Cu1-N6-C13                | 128.58(12)                          |
| N1-C8-C7                                         | 124.42(16)                          | N1-C8-C7                                  | 124.47(16)                          | N2-C1-C2                  | 127.01(15)                          |
| N1-C9-C1                                         | 120.24(15)                          | N1-C9-C1                                  | 120.24(15)                          | N2-C1-C9                  | 113.52(14)                          |
| N1-C9-C5                                         | 122.85(14)                          | N1-C9-C5                                  | 122.86(14)                          | C2-C1-C9                  | 119.47(15)                          |
| C1-C9-C5                                         | 116.88(14)                          | C1-C9-C5                                  | 116.88(14)                          | C13-N5-C15                | 118.78(14)                          |
| N3-C10-C11                                       | 129.38(15)                          | N3-C10-C11                                | 129.38(15)                          | C1-C2-C3                  | 120.39(16)                          |
| N3-C10-C13                                       | 109.06(15)                          | N3-C10-C13                                | 109.09(14)                          | C2-C3-C4                  | 121.17(16)                          |
| C11-C10-C13                                      | 121.56(15)                          | C11-C10-C13                               | 121.52(15)                          | C3-C4-C5                  | 119.77(16)                          |
| O1-C11-N5                                        | 122.35(16)                          | O1-C11-N5                                 | 122.30(15)                          | C4-C5-C6                  | 124.50(16)                          |
| O1-C11-C10                                       | 126.55(15)                          | O1-C11-C10                                | 126.55(15)                          | C4-C5-C9                  | 118.85(15)                          |
| N5-C11-C10                                       | 111.10(14)                          | N5-C11-C10                                | 111.14(13)                          | C6-C5-C9                  | 116.65(16)                          |

|               |                          |               |                          |                |                          |
|---------------|--------------------------|---------------|--------------------------|----------------|--------------------------|
| O2-C12-N5     | 120.66(16)               | O2-C12-N5     | 120.65(15)               | C5-C6-C7       | 120.36(17)               |
| O2-C12-N6     | 122.28(15)               | O2-C12-N6     | 122.32(15)               | C6-C7-C8       | 119.15(17)               |
| N5-C12-N6     | 117.05(14)               | N5-C12-N6     | 117.02(14)               | N1-C8-C7       | 122.46(17)               |
| N4-C13-N6     | 126.35(15)               | N4-C13-N6     | 126.38(14)               | N1-C9-C1       | 117.12(15)               |
| N4-C13-C10    | 110.37(15)               | N4-C13-C10    | 110.31(14)               | N1-C9-C5       | 122.57(15)               |
| N6-C13-C10    | 123.28(16)               | N6-C13-C10    | 123.31(15)               | C1-C9-C5       | 120.32(16)               |
|               |                          |               |                          | N3-C10-C11     | 112.73(15)               |
|               |                          |               |                          | N3-C10-C13     | 127.05(15)               |
|               |                          |               |                          | C11-C10-C13    | 120.22(14)               |
|               |                          |               |                          | O1-C11-N4      | 119.05(15)               |
|               |                          |               |                          | O1-C11-C10     | 124.75(15)               |
|               |                          |               |                          | N4-C11-C10     | 116.20(15)               |
|               |                          |               |                          | O2-C12-N4      | 121.66(17)               |
|               |                          |               |                          | O2-C12-N5      | 121.43(17)               |
|               |                          |               |                          | N4-C12-N5      | 116.91(14)               |
|               |                          |               |                          | N5-C13-N6      | 120.20(15)               |
|               |                          |               |                          | N4-C13-C10     | 117.09(14)               |
|               |                          |               |                          | N6-C13-C10     | 122.71(15)               |
|               |                          |               |                          | O5-N7-O6       | 118.80(14)               |
|               |                          |               |                          | O5-N7-O7       | 119.87(14)               |
|               |                          |               |                          | O6-N7-O7       | 121.34(15)               |
| <b>Atoms</b>  | <b>Torsion Angle (°)</b> | <b>Atoms</b>  | <b>Torsion Angle (°)</b> | <b>Atoms</b>   | <b>Torsion Angle (°)</b> |
| N3-N2-C1-C9   | 48.7(2)                  | N3-N2-C1-C9   | -48.7(2)                 | Cu1-N1-C8-C7   | -176.93(14)              |
| N3-N2-N4-C13  | -0.32(19)                | N3-N2-N4-C13  | 0.32(18)                 | Cu1-N1-C9-C1   | -2.60(18)                |
| C6-C5-C9-C1   | -178.25(15)              | C6-C5-C9-C1   | 178.28(15)               | Cu1-N1-C9-C5   | 177.39(12)               |
| C9-C5-C6-C7   | -0.9(3)                  | C9-C5-C6-C7   | 1.0(3)                   | Cu1-N2-N3-C10  | 0.4(2)                   |
| C13-N6-C12-N5 | 3.2(3)                   | C13-N6-C12-N5 | -3.3(2)                  | Cu1-N2-C1-C9   | 0.94(17)                 |
| C3-C4-C5-C6   | 179.12(19)               | C3-C4-C5-C6   | -179.16(19)              | Cu1-N6-C13-C10 | -4.4(2)                  |
| N4-N2-C1-C9   | -135.41(15)              | N4-N2-C1-C9   | 135.33(15)               | O3-Cu1-N1-C8   | 57.67(15)                |
| N3-C10-C11-O1 | -0.1(4)                  | N3-C10-C11-O1 | 0.1(3)                   | O3-Cu1-N2-C1   | 81.35(12)                |
| C4-C5-C9-N1   | 179.05(16)               | C4-C5-C9-N1   | -179.01(16)              | N2-Cu1-N1-C9   | 2.40(11)                 |
| C14-N5-C11-O1 | 1.1(3)                   | C14-N5-C11-O1 | -1.1(2)                  | N1-Cu1-N2-C1   | -1.82(11)                |
